# Supplementary material
Source: PubMed Central journal article supplement (PMC4808173)
Supplement: AAC.02462-15_zac004165031so1.pdf [file AAC.02462-15_zac004165031so1.pdf]

## Supplemental material

### **Escape mutations in NS4B render dengue virus insensitive to the antiviral activity of the paracetamol metabolite AM404**

Koen W.R. van Cleef<sup>1</sup>, Gijs J. Overheul<sup>1</sup>, Michael C. Thomassen<sup>1,2</sup>, Jenni M. Marjakangas<sup>1</sup>,  
Ronald P. van Rij<sup>1</sup>

<sup>1</sup>Department of Medical Microbiology, Radboud University Medical Center, Radboud Institute for Molecular Life Sciences, Nijmegen, The Netherlands

<sup>2</sup>Current Affiliation: Department of Physiology, Radboud University Medical Center, Radboud Institute for Molecular Life Sciences, Nijmegen, The Netherlands

**Table S1.** Primer sequences used for qRT-PCR-based quantification of DENV RNA in the culture supernatant of infected Hela cells. RNA was isolated from 100 µl of supernatant using Isol-RNA Lysis Reagent (5 PRIME) and cDNA synthesis was performed using TaqMan Reverse Transcription Reagents (Life Technologies). DENV RNA levels were analyzed by qPCR using GoTaq qPCR Master Mix (Promega) on a LightCycler 480 instrument (Roche). Genome copies were calculated based on standard curves with DENV NS1 plasmids.

| <b>Serotype and strain</b> | <b>Primer name</b> | <b>Sequence</b>                |
|----------------------------|--------------------|--------------------------------|
| DENV1 (16007)              | DENV1-NS1 Fw       | 5'-GGGAAGTAGAGGACTATGGATTTG-3' |
|                            | DENV1-NS1 Rv       | 5'-GTGGTCACATACTTGGGTGTAG-3'   |
| DENV2 (NGC)                | DENV2-NS1 Fw       | 5'-AGAACTGAAGTGTGGCAGTGGGAT-3' |
|                            | DENV2-NS1 Rv       | 5'-TGCCCTCTTCATGAGCTTTCTGGA-3' |
| DENV4 (H241)               | DENV4-NS1 Fw       | 5'-ACTTGGGCAAATTGGAGATAGA-3'   |
|                            | DENV4-NS1 Rv       | 5'-CAGTAGTGGTCCTCAAAGATGG-3'   |

**Table S2.** Effect of Cox inhibitors in the NIH Clinical Collection on DENV2 replication and cell viability. Luciferase activity and cell viability of Hela DENV2 replicon cells were determined after 48 h of culture in the presence of compounds (10  $\mu$ M). Data represent percentages of the DMSO control; means and standard deviations of 3 biological replicates are reported. Ribavirin was included as a positive control.

| Compound         | NCC structure ID | PubChem CID | PubChem SID | Luciferase activity (%) |       | Cell viability (%) |       |
|------------------|------------------|-------------|-------------|-------------------------|-------|--------------------|-------|
|                  |                  |             |             | Mean                    | Stdev | Mean               | Stdev |
| AM404            | CPD000449274     | 6604822     | 46386792    | 48.4                    | 1.6   | 102.9              | 6.3   |
| Ampiroxicam      | CPD000469285     | 2176        | 46386688    | 87.4                    | 11.3  | 100.2              | 4.6   |
| Flurbiprofen     | CPD000042823     | 3394        | 46386788    | 98.6                    | 7.3   | 97.2               | 2.4   |
| Indomethacin     | CPD000449290     | 23581802    | 46386809    | 103.5                   | 1.0   | 96.7               | 4.0   |
| Naproxen sodium  | CPD000058746     | 169117      | 46386948    | 97.3                    | 5.8   | 99.4               | 2.4   |
| Parecoxib sodium | CPD000469594     | 15895902    | 46386785    | 86.7                    | 15.3  | 102.6              | 3.5   |
| Piroxicam        | CPD000449291     | 54705052    | 46386918    | 100.5                   | 3.2   | 100.6              | 4.0   |
| Rofecoxib        | CPD000466331     | 5090        | 46386634    | 69.1                    | 12.4  | 97.8               | 4.0   |
| Valdecoxib       | CPD000466327     | 119607      | 46386621    | 93.9                    | 6.1   | 96.2               | 3.3   |
| Ribavirin        |                  | 37542       | 24278685    | 19.1                    | 0.6   | 89.1               | 1.4   |

NCC structure ID, unique structure identifier assigned by Molecular Libraries Small Molecule Repository (MLSMR); PubChem CID, compound identifier; PubChem SID, substance identifier.
